# Supplementary material
Source: PubMed Central journal article supplement (PMC2930763)
Supplement: NIHMS226629-supplement-1_si_001.pdf [file NIHMS226629-supplement-1_si_001.pdf]

## **Supporting Information**

# **Free-Energy Perturbation Simulation on Transition States and High-Activity Mutants of Human Butyrylcholinesterase for (-)-Cocaine Hydrolysis**

Wenchao Yang,<sup>1,2,a</sup> Yongmei Pan,<sup>2,a</sup> Lei Fang,<sup>2</sup> Daquan Gao,<sup>2</sup> Fang Zheng,<sup>2</sup> and  
Chang-Guo Zhan<sup>2,\*</sup>

<sup>1</sup>*Key Laboratory of Pesticide & Chemical Biology of Ministry of Education, College of Chemistry, Central China Normal University, Wuhan 430079, P. R. China*

<sup>2</sup>*Department of Pharmaceutical Sciences, College of Pharmacy, University of Kentucky, 789 South Limestone, Lexington, KY 40536*

**Running title:** FEP Simulation and Mutants of BChE

**Key words:** Butyrylcholinesterase, cocaine, transition state simulation, free energy perturbation, enzyme mutant design

### **Correspondence:**

Chang-Guo Zhan, Ph.D.  
Professor  
Department of Pharmaceutical Sciences  
College of Pharmacy  
University of Kentucky  
789 South Limestone  
Lexington, KY 40536  
TEL: 859-323-3943  
FAX: 859-323-3575  
E-mail: [zhan@uky.edu](mailto:zhan@uky.edu)

---

<sup>a</sup> These authors contributed equally to this work.

\* Corresponding author. E-mail: [zhan@uky.edu](mailto:zhan@uky.edu)

## Teap input file for setting TS1 Molecular Dynamic Simulation

```
source leaprc.ff03
source leaprc.gaff
```

```
loadamberprep L4_TS1.prep
loadamberparams COG_TS1-QMMM-half-force.frmod
x = loadpdb pdb
```

```
# =====
# Disulfide Bond Settings
# =====
bond x.65.SG x.92.SG
bond x.252.SG x.263.SG
bond x.400.SG x.519.SG
```

```
# =====
# TS1 Geometrical Restraint Settings
# =====
set x.533.C32 element C
```

```
set x.198.HG type GO
set x.198.HG pertType GO
set x.198.HG pert true
```

```
bond x.198.OG x.533.C32
bond x.198.HG x.438.NE2
```

```
# =====
# TS1 RESP Charge Settings
# =====
set x.198.CB charge 0.943593
set x.198.HB2 charge -0.342638
set x.198.HB3 charge -0.342638
set x.198.OG charge -0.768909
set x.198.HG charge 0.270328
set x.325.CG charge 0.373161
set x.325.HG2 charge -0.147799
set x.325.HG3 charge -0.147799
set x.325.CD charge 0.772258
set x.325.OE1 charge -0.815823
set x.325.OE2 charge -0.815823
set x.438.CB charge 0.773533
set x.438.HB2 charge -0.241844
```

set x.438.HB3 charge -0.241844  
set x.438.CG charge -0.027996  
set x.438.ND1 charge -0.130300  
set x.438.HD1 charge 0.133114  
set x.438.CE1 charge -0.000184  
set x.438.HE1 charge 0.273829  
set x.438.NE2 charge -0.075426  
set x.438.CD2 charge -0.296473  
set x.438.HD2 charge 0.223556  
set x.533.C1 charge -0.080305  
set x.533.H2 charge 0.119641  
set x.533.H3 charge 0.119641  
set x.533.H4 charge 0.119641  
set x.533.O5 charge -0.435106  
set x.533.C6 charge 0.989364  
set x.533.O7 charge -0.692263  
set x.533.C8 charge -0.584711  
set x.533.H9 charge 0.286167  
set x.533.C10 charge -0.107359  
set x.533.N20 charge -0.472431  
set x.533.C22 charge -0.881557  
set x.533.H23 charge 0.333947  
set x.533.H24 charge 0.333947  
set x.533.H25 charge 0.333947  
set x.533.H21 charge 0.553621  
set x.533.H11 charge 0.222974  
set x.533.C12 charge 0.197362  
set x.533.H13 charge 0.041417  
set x.533.H14 charge 0.041417  
set x.533.C15 charge -0.378847  
set x.533.H16 charge 0.123321  
set x.533.H17 charge 0.123321  
set x.533.C18 charge 0.583020  
set x.533.H19 charge 0.047197  
set x.533.C26 charge -0.995627  
set x.533.H27 charge 0.239247  
set x.533.H28 charge 0.239247  
set x.533.C29 charge 1.082902  
set x.533.H30 charge -0.043165  
set x.533.O31 charge -0.529473  
set x.533.C32 charge 0.223308  
set x.533.O33 charge -0.634238  
set x.533.C34 charge 0.285634  
set x.533.C35 charge -0.188575

```
set x.533.H36 charge 0.134039
set x.533.C37 charge -0.167364
set x.533.H38 charge 0.162738
set x.533.C39 charge -0.153713
set x.533.H40 charge 0.189759
set x.533.C41 charge -0.167364
set x.533.H42 charge 0.162739
set x.533.C43 charge -0.188575
set x.533.H44 charge 0.134039
```

```
# -- For backbone atoms of QM residues --
# -- taken from AMBER ff03 (all_amino03.in)
```

```
set x.198.N charge -0.541400
set x.198.H charge 0.345400
set x.198.CA charge 0.118100
set x.198.HA charge 0.142200
set x.198.C charge 0.483400
set x.198.O charge -0.580800
set x.325.N charge -0.423400
set x.325.H charge 0.306800
set x.325.CA charge 0.031600
set x.325.HA charge 0.065100
set x.325.CB charge 0.074800
set x.325.HB2 charge -0.003500
set x.325.HB3 charge -0.003500
set x.325.C charge 0.469700
set x.325.O charge -0.592500
set x.438.N charge -0.506800
set x.438.H charge 0.351000
set x.438.CA charge 0.119100
set x.438.HA charge 0.137800
set x.438.C charge 0.515900
set x.438.O charge -0.599800
```

```
# =====
# Save Topology files
# =====
addions x Cl- 0
solvatebox x TIP3PBOX 10
saveAmberParm x x.top x.crd
quit
```

**The content of *COG\_TS1-QMMM-half-force.frcmod* used in the tleap input file**

MASS

|    |       |       |                      |                                                 |
|----|-------|-------|----------------------|-------------------------------------------------|
| cx | 12.01 | 0.616 | Sp2 C carbonyl group | Carboxyl carbon (C32)                           |
| GN | 1.008 | 0.161 | Hydrogen on N        | GN is the hydrogen between<br>His and Glu (HD1) |
| GO | 1.008 | 0.135 | Hydroxyl group H     | Ser198 hydroxyl<br>hydrogen (HG or HE2)         |

BOND

|       |       |       |                    |                                                  |
|-------|-------|-------|--------------------|--------------------------------------------------|
| cx-os | 200.9 | 1.420 | COG in TS1         |                                                  |
| cx-o  | 270.2 | 1.240 | COG in TS1         |                                                  |
| cx-OH | 234.1 | 2.030 | COG in TS1         | OH is the atom type of Ser198<br>hydroxyl oxygen |
| cx-ca | 173.2 | 1.500 | COG in TS1         |                                                  |
| GN-NA | 217.0 | 1.070 | HD1 in HIS of TS1  |                                                  |
| GN-O2 | 217.0 | 1.600 | Added bond for TS1 |                                                  |
| GO-OH | 276.5 | 1.520 | HG in SER of TS1   |                                                  |
| GO-NB | 276.5 | 1.110 | added bond         |                                                  |

ANGLE

|          |        |         |                                    |                           |
|----------|--------|---------|------------------------------------|---------------------------|
| os-c -ca | 67.662 | 110.765 | Calculated with empirical approach |                           |
| cx-os-c3 | 63.0   | 120.79  | NEW_MP2/6-31G COG                  |                           |
| o -cx-os | 75.4   | 118.38  | MP2/6-31G* COG                     |                           |
| os-cx-ca | 67.662 | 112.01  | same as os-c -ca                   |                           |
| ca-cx-o  | 67.1   | 122.55  | NEW_MP2/6-31G COG                  |                           |
| cx-ca-ca | 62.0   | 121.66  | NEW_MP2/6-31G COG                  |                           |
| CT-OH-cx | 50.5   | 107.38  | new type for COG and ser197        |                           |
| OH-cx-os | 60.5   | 98.38   | new type reduced force             |                           |
| OH-cx-o  | 60.5   | 106.26  | only bond length important         |                           |
| ca-cx-OH | 50.9   | 91.41   |                                    |                           |
| cx-OH-GO | 50.9   | 117.88  | above are for COG                  |                           |
| CC-NA-GN | 50.0   | 131.50  | GN is H in his in TS1              | CC is atom<br>type of CG  |
| CR-NA-GN | 50.0   | 120.22  | GN is H, his in TS1                | CR is atom<br>type of CE1 |
| CT-OH-GO | 55.0   | 104.59  | GO is HG in SER for TS1            |                           |
| C -O2-GN | 50.1   | 135.41  |                                    |                           |

|             |        |        |               |                     |                     |
|-------------|--------|--------|---------------|---------------------|---------------------|
| O2-GN-NA    | 50.1   | 155.46 |               |                     |                     |
| OH-GO-NB    | 50.1   | 157.82 |               |                     |                     |
| GO-NB-CR    | 50.1   | 132.64 |               |                     |                     |
| GO-NB-CV    | 50.1   | 117.98 |               |                     |                     |
| DIHE        |        |        |               |                     |                     |
| X -cx-os-X  | 2      | 5.400  | 180.000       | 2.000               |                     |
| X -cx-ca-X  | 4      | 14.500 | 180.000       | 2.000               | intrpol.bsd.on      |
| C6H6        |        |        |               |                     |                     |
| X -cx-OH-X  | 2      | 0.000  | 0.000         | 3.000               | 3-fold, no<br>force |
| CT-C -O2-GN | 2      | 0.000  | 180.000       | 2.000               |                     |
| C -O2-GN-NA | 2      | 0.000  | 180.000       | 2.000               |                     |
| O2-C -O2-GN | 2      | 0.000  | 180.000       | 2.000               |                     |
| O2-GN-NA-CC | 2      | 0.000  | 180.000       | 2.000               |                     |
| O2-GN-NA-CR | 2      | 0.000  | 180.000       | 2.000               |                     |
| CT-OH-GO-NB | 2      | 0.000  | 180.000       | 2.000               |                     |
| OH-GO-NB-CR | 2      | 0.000  | 180.000       | 2.000               |                     |
| OH-GO-NB-CV | 2      | 0.000  | 180.000       | 2.000               |                     |
| cx-OH-GO-NB | 2      | 0.000  | 180.000       | 2.000               |                     |
| IMPROPER    |        |        |               |                     |                     |
| c3-o -c -os | 1.1    | 180.0  | 2.0           | Using default value |                     |
| ca-o -c -os | 1.1    | 180.0  | 2.0           | Using default value |                     |
| c -ca-ca-ca | 1.1    | 180.0  | 2.0           | Using default value |                     |
| ca-ca-ca-ha | 1.1    | 180.0  | 2.0           | Using default value |                     |
| c3-o -cx-os | 1.1    | 180.0  | 2.0           | Using default value |                     |
| ca-o -cx-os | 1.1    | 180.0  | 2.0           | Using default value |                     |
| cx-ca-ca-ca | 1.1    | 180.0  | 2.0           | Using default value |                     |
| NONBON      |        |        |               |                     |                     |
| cx          | 1.9080 | 0.0860 | OPLS (c type) |                     |                     |
| GN          | 0.6000 | 0.0157 | Hydrogen on N |                     |                     |
| GO          | 0.0000 | 0.0000 | Hydroxyl H    |                     |                     |

Table S1. The  $\Delta G_E$  or  $\Delta G_{TS1}$  values (in kcal/mol) obtained from the FEP simulations using five different initial structures associated with different snapshots of the MD trajectory.

| Mutation simulated                                            | Energy change    | FEP direction | Calculated $\Delta G_E$ or $\Delta G_{TS1}$ values using various initial structures |       |       |       |       | Average value |
|---------------------------------------------------------------|------------------|---------------|-------------------------------------------------------------------------------------|-------|-------|-------|-------|---------------|
|                                                               |                  |               |                                                                                     |       |       |       |       |               |
| A199S/A328W/Y332G<br>↓<br>A199S/F227A/A328W/Y332G             | $\Delta G_E$     | Forward       | 5.76                                                                                | 5.98  | 6.58  | 6.23  | 6.26  | 6.16          |
|                                                               |                  | Backward      | -5.94                                                                               | -6.03 | -6.65 | -6.31 | -5.45 | -6.08         |
|                                                               | $\Delta G_{TS1}$ | Forward       | 5.11                                                                                | 5.12  | 5.24  | 4.73  | 4.55  | 4.95          |
|                                                               |                  | Backward      | -5.06                                                                               | -5.20 | -5.32 | -4.89 | -4.63 | -5.02         |
| A199S/A328W/Y332G<br>↓<br>A199S/S287A/A328W/Y332G             | $\Delta G_E$     | Forward       | 8.32                                                                                | 8.75  | 8.67  | 8.37  | 8.57  | 8.54          |
|                                                               |                  | Backward      | -8.43                                                                               | -8.84 | -8.74 | -8.47 | -8.65 | -8.63         |
|                                                               | $\Delta G_{TS1}$ | Forward       | 6.98                                                                                | 7.34  | 7.98  | 8.09  | 8.32  | 7.74          |
|                                                               |                  | Backward      | -7.07                                                                               | -7.39 | -8.04 | -8.20 | -8.40 | -7.82         |
| A199S/S287A/A328W/Y332G<br>↓<br>A199S/S287G/A328W/Y332G       | $\Delta G_E$     | Forward       | -6.29                                                                               | -6.45 | -5.46 | -4.92 | -5.63 | -5.75         |
|                                                               |                  | Backward      | 6.03                                                                                | 6.28  | 5.28  | 4.78  | 5.55  | 5.58          |
|                                                               | $\Delta G_{TS1}$ | Forward       | -6.62                                                                               | -5.07 | -6.20 | -5.75 | -5.83 | -5.89         |
|                                                               |                  | Backward      | 6.46                                                                                | 4.89  | 6.06  | 5.61  | 5.67  | 5.74          |
| A199S/S287G/A328W/Y332G<br>↓<br>A199S/F227A/S287G/A328W/Y332G | $\Delta G_E$     | Forward       | 6.76                                                                                | 5.95  | 6.81  | 7.22  | 7.15  | 6.78          |
|                                                               |                  | Backward      | -6.94                                                                               | -6.10 | -6.94 | -7.32 | -7.24 | -6.91         |
|                                                               | $\Delta G_{TS1}$ | Forward       | 5.78                                                                                | 4.95  | 5.48  | 6.51  | 5.84  | 5.71          |
|                                                               |                  | Backward      | -5.90                                                                               | -5.15 | -5.67 | -6.71 | -5.97 | -5.88         |
